# Supplementary material
Source: Elsevier journal article supplement (https://www.sciencedirect.com/science/article/pii/S0211139X20301748)
Supplement: mmc1 [file S0211139X20301748:mmc1.docx]

**Título: Mortalidad y factores pronósticos asociados en pacientes ancianos y muy ancianos hospitalizado con enfermedad respiratoria por COVID-19.**

**MATERIAL SUPLEMENTARIO**

| **Tabla A1. Incidencia de eventos en función de IECA/ARA2** | | | | | | |
| --- | --- | --- | --- | --- | --- | --- |
| ***IECA o ARA2 previo a la hospitalización (n=240)*** | | | | | ***Sin IECA o ARA2 previo a la hospitalización (n=176)***  ***p-valor*** | |
|  |  | IECA (n=102) | ARA2 (n=138) | ***p-valora*** |
| *Mortalidad* | 101 (42,1%) | 44 (42,5) | 57 (41,3%) | 0,79 | 139 (78,9%) | **0,009** |
| ***IECA o ARA 2 durante la hospitalización (n=107)*** | | | | | ***Sin IECA o ARA 2 durante la hospitalización (n=309)***  ***p-valor*** | |
|  |  | *IECA (n=54)* | *ARA2 (n=65)* | ***p-valorb*** |
| *Mortalidad* | 48 (44,85%) | 20 (37%) | 28 (43%) | 0,4 | 150 (48,5%) | 0,51 |

ARA2: antagonista del receptor de angiotensina 2; IECA: inhibidores de la enzima conversora de angiotensina.

a Valor de p de comparación entre subgrupos con IECA y ARA2 previo al ingreso.

b Valor de p de comparación entre subgrupos con IECA y ARA2 durante la hospitalización

| **Tabla A2. Análisis de supervivencia. Mortalidad por todas las causas** | | |
| --- | --- | --- |
|  | ***Días hasta muerte, media (DE)*** | ***P-valor*** |
| **Grupos de edad** |  |  |
| 75-84 años | 59,4±2,8 | **0,01** |
| ≥85 años | 48,5±2,9 |
| **Sexo, n (%)** |  |  |
| *Varón* | 53,1±3 | 0,68 |
| *Mujer* | 54,7±2,8 |
| **Antecedentes personales** | |  |
| *Hipertensión arterial* | 54,5±2,3 | 0,54 |
| *No Hipertensión arterial* | 47,4±4,3 |
| *Diabetes Mellitus* | 58,7±4 | 0,12 |
| *No Diabetes Mellitus* | 50,8±2,3 |
| *Tabaquismo* | 45,7±5,5 | 0,29 |
| *No tabaquismo* | 55,3±2,2 |
| *Obesidad* | 49,1±4,9 | 0,78 |
| *No obesidad* | 54,5±2,2 |
| *EPOC* | 51,7±5,9 | 0,85 |
| *No EPOC* | 54,3±2,2 |
| *Asma* | 41,4±12,1 | 0,78 |
| *No Asma* | 54,3±2,1 |
| *SAHS* | 37±7 | **0,04** |
| *No SAHS* | 55,2±2,1 |
| *ERC* | 39,2±4,3 | **<0,001** |
| *No ERC* | 57,8±2,3 |
| **SDRA** |  |  |
| *Leve* | 76±2,9 | **<0,001** |
| *Moderado* | 41±3,2 |
| *Grave* | 19,5±3,4 |
| **Tratamiento antihipertensivo previo al ingreso** | |  |
| *IECA/ARA2* | 58,1±2,7 | **0,019** |
| *No IECA/ARA2* | 46,4±2,9 |
| *ACA* | 57,3±4,5 | 0,41 |
| *No ACA* | 52,9±2,3 |
| *Betabloqueantes* | 54,3±3,8 | 0,9 |
| *No Betabloqueante* | 53,8±2,5 |
| *Diuréticos de asa* | 48,6±3,8 | 0,1 |
| *No Diurético de asa* | 54,5±2,3 |
| *Alfabloqueantes* | 51,3±7,2 | 0,7 |
| *No alfabloqueante* | 54,4±2,2 |
| **Tratamiento antihipertensivo en el ingreso** | |  |
| *IECA/ARA2* | 56,9±4,1 | 0,46 |
| *No IECA/ARA2* | 50±2,2 |
| *ACA* | 64,9±3 | **<0,001** |
| *No ACA* | 45,5±2,7 |
| *Betabloqueantes* | 53,1±3,9 | 0,9 |
| *No Betabloqueante* | 54,3±2,4 |
| *Diuréticos de asa* | 49,1±3,5 | 0,12 |
| *No Diurético de asa* | 54,7±2,4 |
| *Alfabloqueantes* | 43,9±7,7 | 0,44 |
| *No alfabloqueante* | 54,5±2,1 |
| **Tratamientos frente al COVID19 durante el ingreso** | |  |
| *Hidroxicloroquina* | 57±2,2 | **<0,001** |
| *No hidroxicloroquina* | 38,35±4,8 |
| *Lopinavir/Ritonavir* | 56,5±3,9 | 0,11 |
| *No lopinavir/ritonavir* | 52,6±2,4 |
| *Azitromicina* | 59,2±2,6 | **0,005** |
| *No azitromizina* | 46,7±3,3 |
| *Anticoagulación profiláctica* | 50,8±2,4 | 0,42 |
| *No anticoagulación profiláctica* | 56,1±3,4 |
| *Anticoagulación terapéutica* | 65,7±4 | **0,003** |
| *No antiacoagulación terapéutica* | 49,15±6,2 |
| *Anticoagulación terapeútica por FA* | 59,6±6,2 | 0,051 |
| *No anticaogulación terapeútica por FA* | 42,14±2,2 |
| *Anticoagulación terapéutica por otros motivos* | 70±5,1 | **0,008** |
| *No anticoagulación terapéutica por otros motivos* | 50,1±2,4 |
| *Corticoides* | 53,6±2,8 | 0,93 |
| *No corticoides* | 52,2±2,8 |
| *Tratamientos biológicos* | 32,6±9,6 | 0,25 |
| *No tratamientos biológicos* | 54,5±2,1 |

*Datos expresados como como media ± desviación típica. Test estadístico log-rank. Abreviaturas: ACA (calcioantagonista); ARA2 (antagonista del receptor de angiotensina 2); EPOC (enfermedad pulmonar obstructiva crónica); ERC (enfermedad renal crónica); FA (fibrilación auricular); IECA (inhibidor de la enzima conversora de angiotensina); SAHS (síndrome de apnea-hipopnea del sueño); SDRA (síndrome de distrés respiratorio del adulto).*
